# Supplementary material
Source: MDPI journal article supplement (https://www.mdpi.com/2311-5637/9/9/807)
Supplement: s1 [file s1]

# Supplementary Materials:

**Table S1.** Carbohydrate fermentation pattern of isolated *Lactobacillus* species from fermented rice tested using API 50 CHL system

|    | Sugar                     | mg/cup | Lb- |      |      |      | Lb- |    | Lb- | Lc-1 |
|----|---------------------------|--------|-----|------|------|------|-----|----|-----|------|
|    |                           |        | 1   | Lb-2 | Lb-4 | Lb-8 | 10  | 11 | 17  |      |
| 0  | Control                   |        | -   | -    | -    | -    | -   | -  | -   | -    |
| 1  | Glycerol                  | 1.64   | -   | -    | -    | -    | -   | -  | -   | -    |
| 2  | Erythritol                | 1.44   | -   | -    | -    | -    | -   | -  | -   | -    |
| 3  | D-Arabinose               | 1.4    | -   | -    | -    | -    | -   | -  | -   | -    |
| 4  | L-Arabinose               | 1.4    | -   | -    | -    | -    | +   | -  | +   | +-   |
| 5  | D-Ribose                  | 1.4    | +   | +    | -    | -    | +   | +  | +   | +    |
| 6  | D-Xylose                  | 1.4    | -   | -    | -    | +    | +   | -  | +   | +    |
| 7  | L-Xylose                  | 1.4    | -   | -    | -    | -    | -   | -  | -   | -    |
| 8  | D-Adonitol                | 1.36   | -   | -    | -    | -    | -   | -  | -   | -    |
| 9  | Methyl-βD-Xylopyranoside  | 1.28   | -   | -    | -    | -    | -   | -  | -   | -    |
| 10 | D-Galactose               | 1.4    | +   | +    | +    | -    | +   | +  | +   | +    |
| 11 | D-Glucose                 | 1.56   | +   | +    | +    | +    | +   | +  | +   | +    |
| 12 | D-Fructose                | 1.4    | +   | +    | +    | +    | +   | +  | +   | +    |
| 13 | D-Mannose                 | 1.4    | +   | +    | +    | +    | +   | +  | +   | +    |
| 14 | L-Sorbose                 | 1.4    | -   | -    | -    | -    | -   | -  | -   | -    |
| 15 | L-Rhamnose                | 1.36   | -   | -    | -    | -    | -   | -  | -   | -    |
| 16 | Dulcitol                  | 1.36   | -   | -    | -    | -    | -   | -  | -   | -    |
| 17 | Inositol                  | 1.4    | -   | -    | -    | -    | -   | -  | -   | -    |
| 18 | D-Mannitol                | 1.36   | -   | -    | -    | -    | +   | -  | -   | -    |
| 19 | D-Sorbitol                | 1.36   | -   | -    | -    | -    | +   | -  | -   | -    |
| 20 | Methyl-αD-Mannopyranoside | 1.28   | -   | -    | -    | -    | -   | -  | -   | -    |
| 21 | Methyl-αD-Glucopyranoside | 1.28   | -   | -    | -    | -    | -   | -  | -   | -    |
| 22 | N-AcetylGlucosamine       | 1.28   | +   | +    | +    | -    | +   | +  | +   | +    |
| 23 | Amygdalin                 | 1.08   | -   | -    | -    | -    | +   | -  | +   | +    |

|                           |                           |       |      |      |      |      |      |      |      |      |
|---------------------------|---------------------------|-------|------|------|------|------|------|------|------|------|
| 24                        | Arbutin                   | 1.08  | -    | -    | -    | -    | +    | -    | +    | +    |
| 25                        | Esculin,                  | 1.16  |      |      |      |      |      |      |      |      |
|                           | ferric citrate            | 0.152 | +    | +    | -    | -    | +    | +    | +    | +    |
| 26                        | Salicin                   | 1.04  | +    | +    | -    | -    | +    | +    | +    | +    |
| 27                        | Cellobiose                | 1.32  |      |      |      |      | +    |      | +    | +    |
| 28                        | Maltose                   | 1.4   | +    | +    | +    | +    | +    | +    | +    | +    |
| 29                        | D-Lactose (bovine origin) | 1.4   | -    | -    | -    | -    | -    | -    | -    | -    |
| 30                        | D-Melibiose               | 1.32  | -    | -    | -    | -    | +    | -    | -    | -    |
| 31                        | D-Saccharose (sucrose)    | 1.32  | -    | -    | -    | +    | +    | -    | -    | -    |
| 32                        | D-Trehalose               | 1.32  | -    | -    | -    | -    | +    | +    | +    | +    |
| 33                        | Inulin                    | 1.28  | -    | -    | -    | -    | -    | -    | -    | -    |
| 34                        | D-MeLeZitose              | 1.32  | -    | -    | -    | -    | -    | -    | -    | -    |
| 35                        | D-Raffinose               | 1.56  | -    | -    | -    | -    | -    | -    | -    | -    |
| 36                        | Amidon (starch)           | 1.28  | -    | -    | -    | -    | -    | -    | -    | -    |
| 37                        | Glycogen                  | 1.28  | -    | -    | -    | -    | -    | -    | -    | -    |
| 38                        | Xylitol                   | 1.4   | -    | -    | -    | -    | -    | -    | -    | -    |
| 39                        | Gentiobiose               | 0.5   | -    | -    | -    | -    | +    | -    | -    | -    |
| 40                        | D-Turanose                | 1.32  | -    | -    | -    | -    | +    | -    | -    | -    |
| 41                        | D-Lyxose                  | 1.4   | -    | -    | -    | -    | -    | -    | -    | -    |
| 42                        | D-Tagatose                | 1.4   | -    | -    | -    | -    | +    | -    | +    | +    |
| 43                        | D-Fucose                  | 1.28  | -    | -    | -    | -    | -    | -    | -    | -    |
| 44                        | L-Fucose                  | 1.28  | -    | -    | -    | -    | -    | -    | -    | -    |
| 45                        | D-Arabitol                | 1.4   | -    | -    | -    | -    | -    | -    | -    | -    |
| 46                        | L-Arabitol                | 1.4   | -    | -    | -    | -    | -    | -    | -    | -    |
| 47                        | Potassium gluconate       | 1.84  | -    | -    | -    | -    | -    | -    | -    | -    |
| 48                        | Potassium 2-Ketogluconate | 2.12  | -    | -    | -    | -    | -    | -    | -    | -    |
| 49                        | Potassium                 | 5-    | 1.8  | -    | -    | -    | -    | -    | -    | -    |
|                           | KetoGluconate             |       |      |      |      |      |      |      |      |      |
| Total Fermented sugar (%) |                           |       | 18.4 | 18.4 | 12.2 | 12.2 | 44.9 | 20.4 | 32.6 | 36.7 |
|                           |                           |       | %    | %    | 4%   | 4%   | %    | %    | 5%   | %    |

+: Positive reaction, -: Negative reaction.

**Table S2 : Colonies observed on MRS media plates**

| Isolation source | Morpho types   | Gram test | Catalase test | No.      |
|------------------|----------------|-----------|---------------|----------|
| White raw        | Cluster coccus | +         | -             | 14       |
|                  | Candida        | +         | -             | 2        |
|                  | Bacillus       | +         | -             | 1        |
| Red Raw          | Cluster coccus | +         | -             | 14       |
|                  | Candida        | +         | -             | 1        |
|                  | Diplococcus    | +         | -             | 1        |
| White cooked     | Cluster coccus | +         | -             | 2        |
|                  | Candida        | +         | -             | 2        |
|                  | Bacillus       | +         | -             | 2        |
|                  | Diplo coccus   | +         | -             | 2        |
| Red cooked       | Bacillus       | -         | -             | 1        |
|                  | Candida        | -         | -             | <b>1</b> |
| Total            |                |           |               |          |

**Table S 3:** Colonies observed on MRS- Sorbitol 0.2 % media plates

| Isolation source | Morpho types    | Gram test | Catalase test | No.      |
|------------------|-----------------|-----------|---------------|----------|
| White raw        | Cluster coccus  | +         | -             | 6        |
|                  | Diplo coccus    | +         | -             | 7        |
|                  | Bacillus        | +         | -             | <b>3</b> |
| Red Raw          | Diplo coccus    | +         | -             | 9        |
| White cooked     | Cluster coccus: | +         | -             | 1        |
|                  | Bacillus        | +         | -             | <b>3</b> |
|                  | Bacillus        | -         | -             | 3        |
|                  | Diplo coccus    | +         | -             | 3        |
| Red cooked       | Bacillus        | +         | -             | <b>3</b> |
|                  | Bacillus        | -         | -             | 1        |
|                  | Diplo coccus    | +         | -             | 1        |
|                  | Candida         | +         | -             | 1        |
|                  | Streptococcus   | -         | -             | 2        |
|                  | Cocco bacillus  | -         | -             | 1        |
| Total            |                 |           |               |          |

**Table S 4:** Colonies observed on MRS- L-Cysteine 0.25% media plates

| Isolation    |                | Gram | Catalase |          |
|--------------|----------------|------|----------|----------|
| source       | Morpho types   | test | test     | No       |
| White raw    | Cluster coccus | +    | -        | 4        |
|              | Diplo coccus   | +    | -        | 2        |
|              | Bacillus       | +    | -        | <b>8</b> |
| Red Raw      | Cluster coccus | +    | -        | 6        |
|              | Bacillus       | +    | -        | 4        |
|              | Diplo coccus   | +    | -        | 1        |
| White cooked | Bacillus       | +    | -        | 6        |
| Red cooked   | Cluster coccus | +    | -        | 1        |
|              | Diplo coccus   | +    | -        | 3        |
| Total        |                |      |          |          |
